# Supplementary figures and images for: Microbiome Dysbiosis Is Associated with Castration Resistance and Cancer Stemness in Metastatic Prostate Cancer
Source: MDPI journal article supplement (doi:10.3390/ijms25063291), 2024-03-14

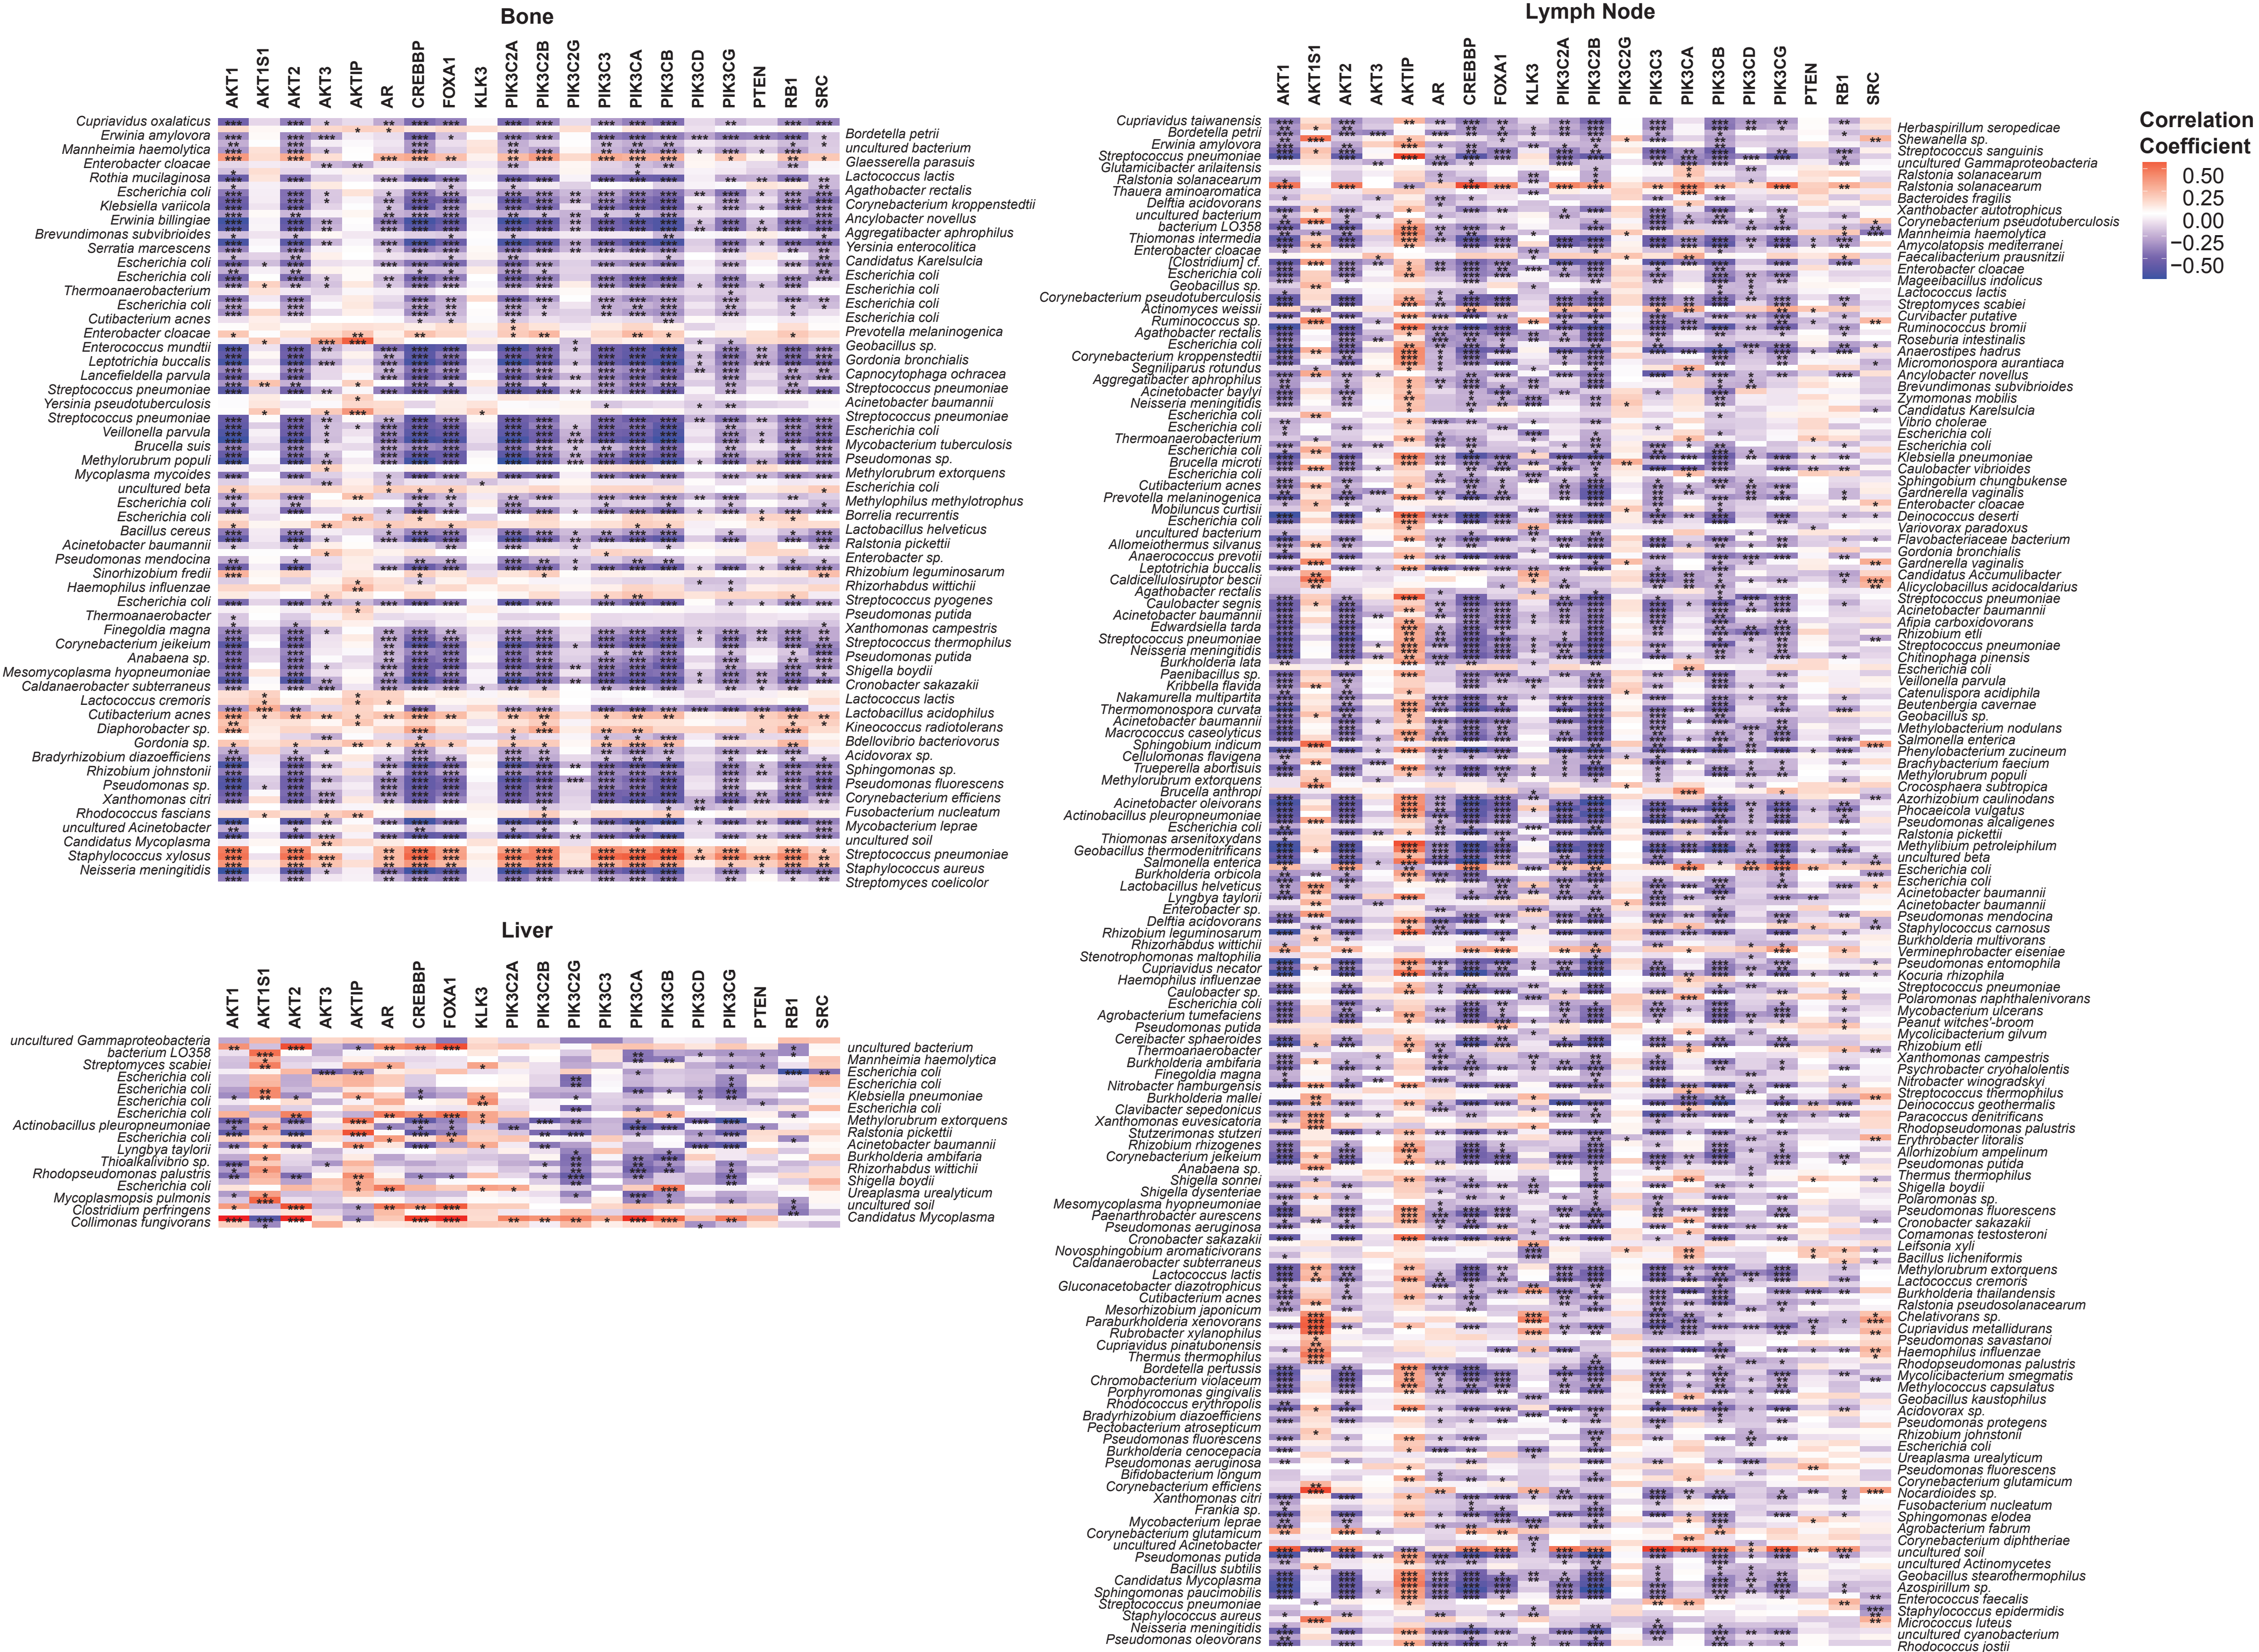

Supplement: s1 [file s1]

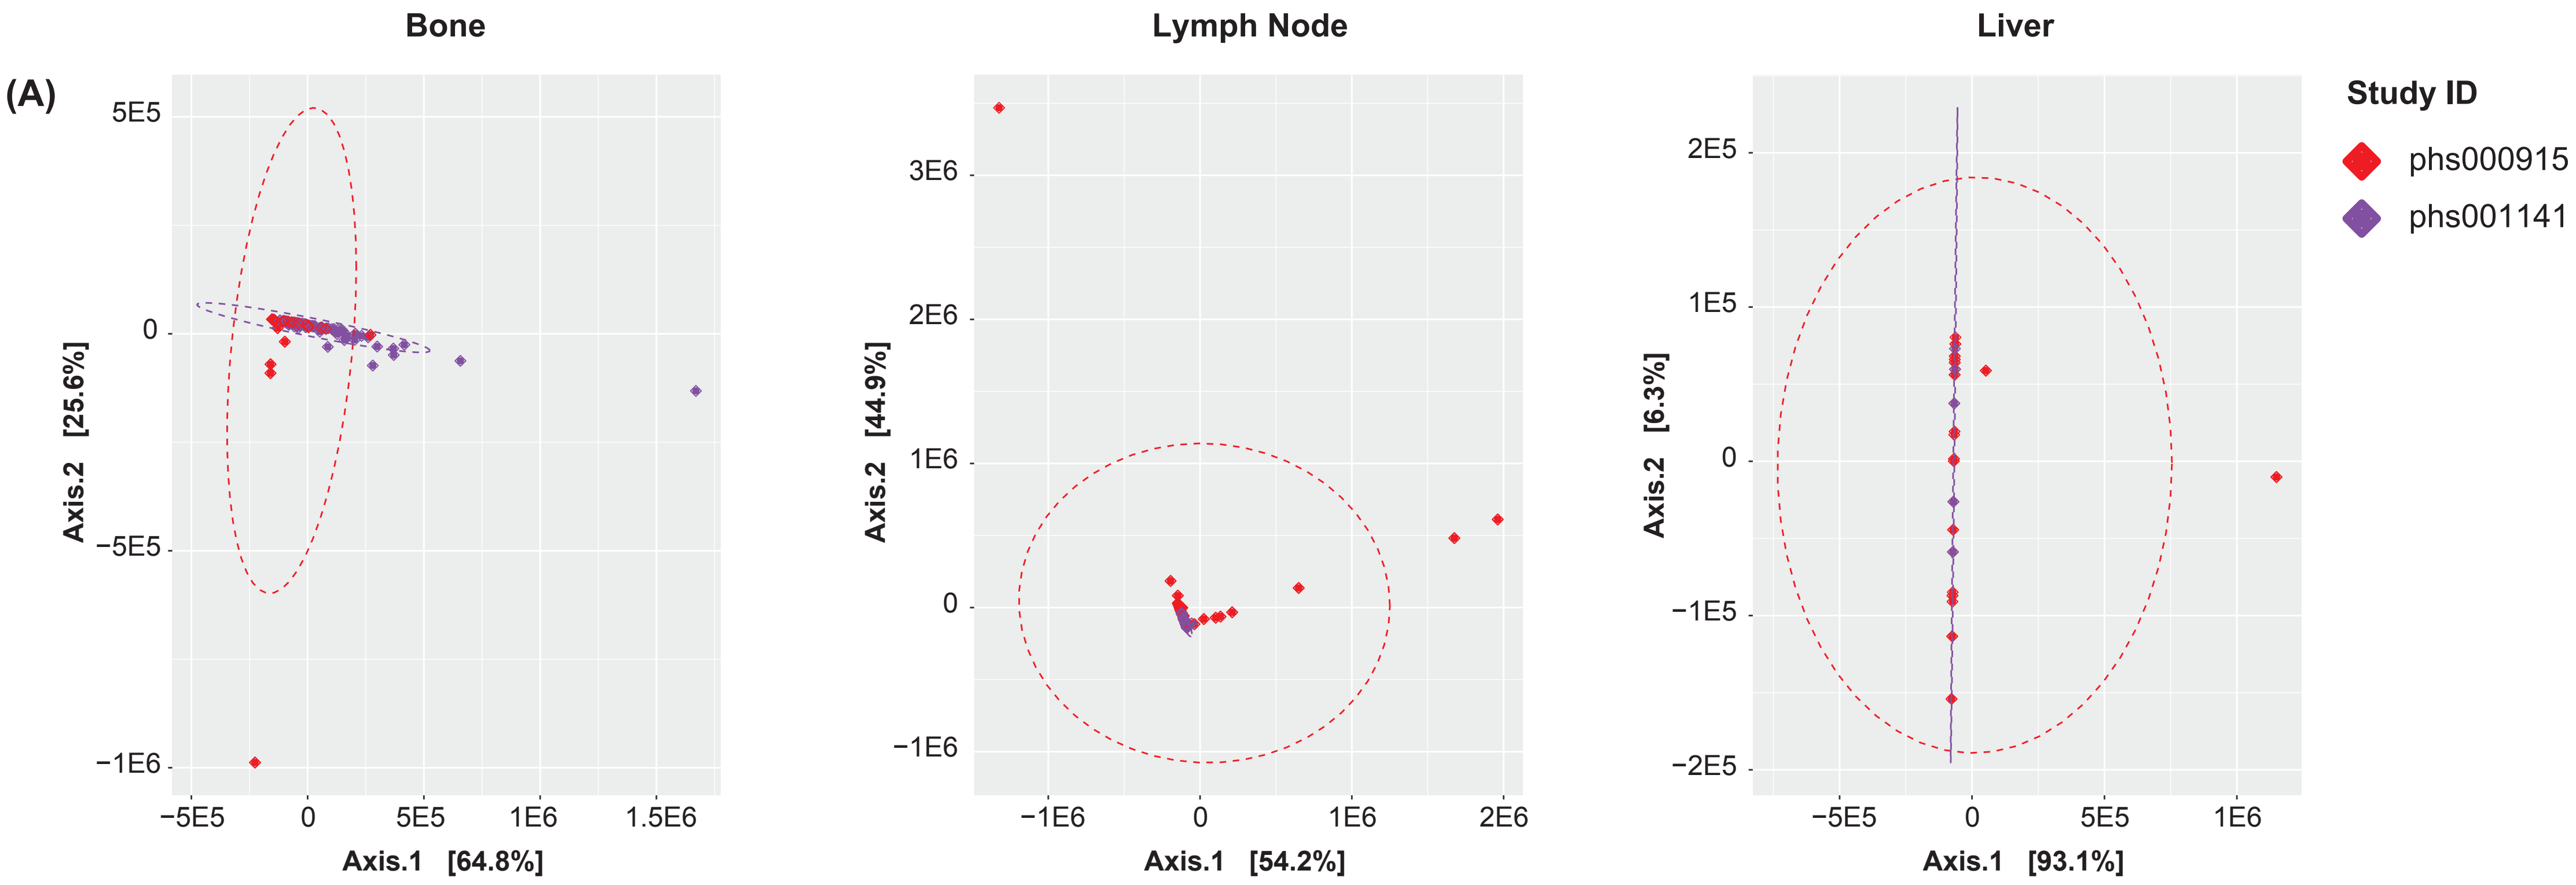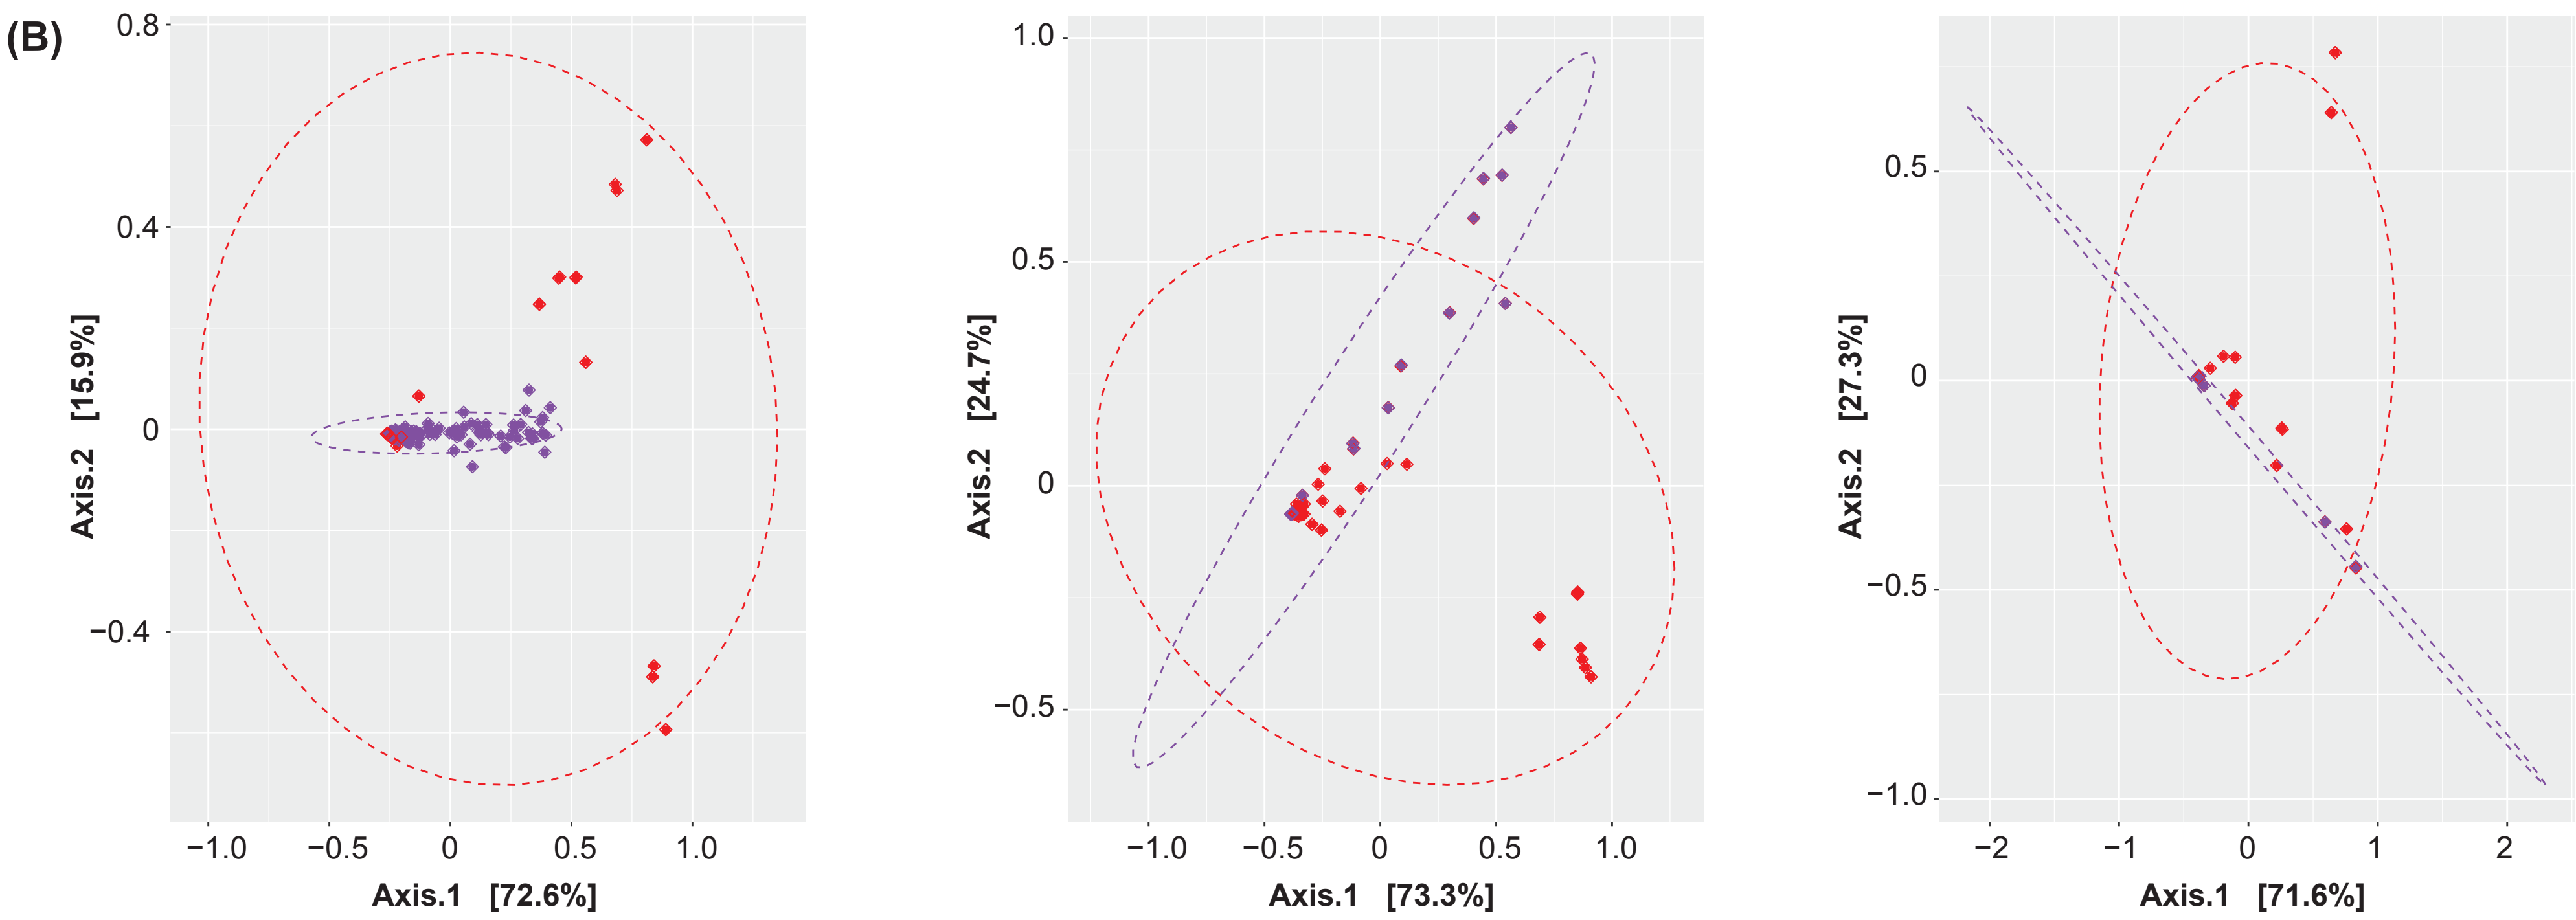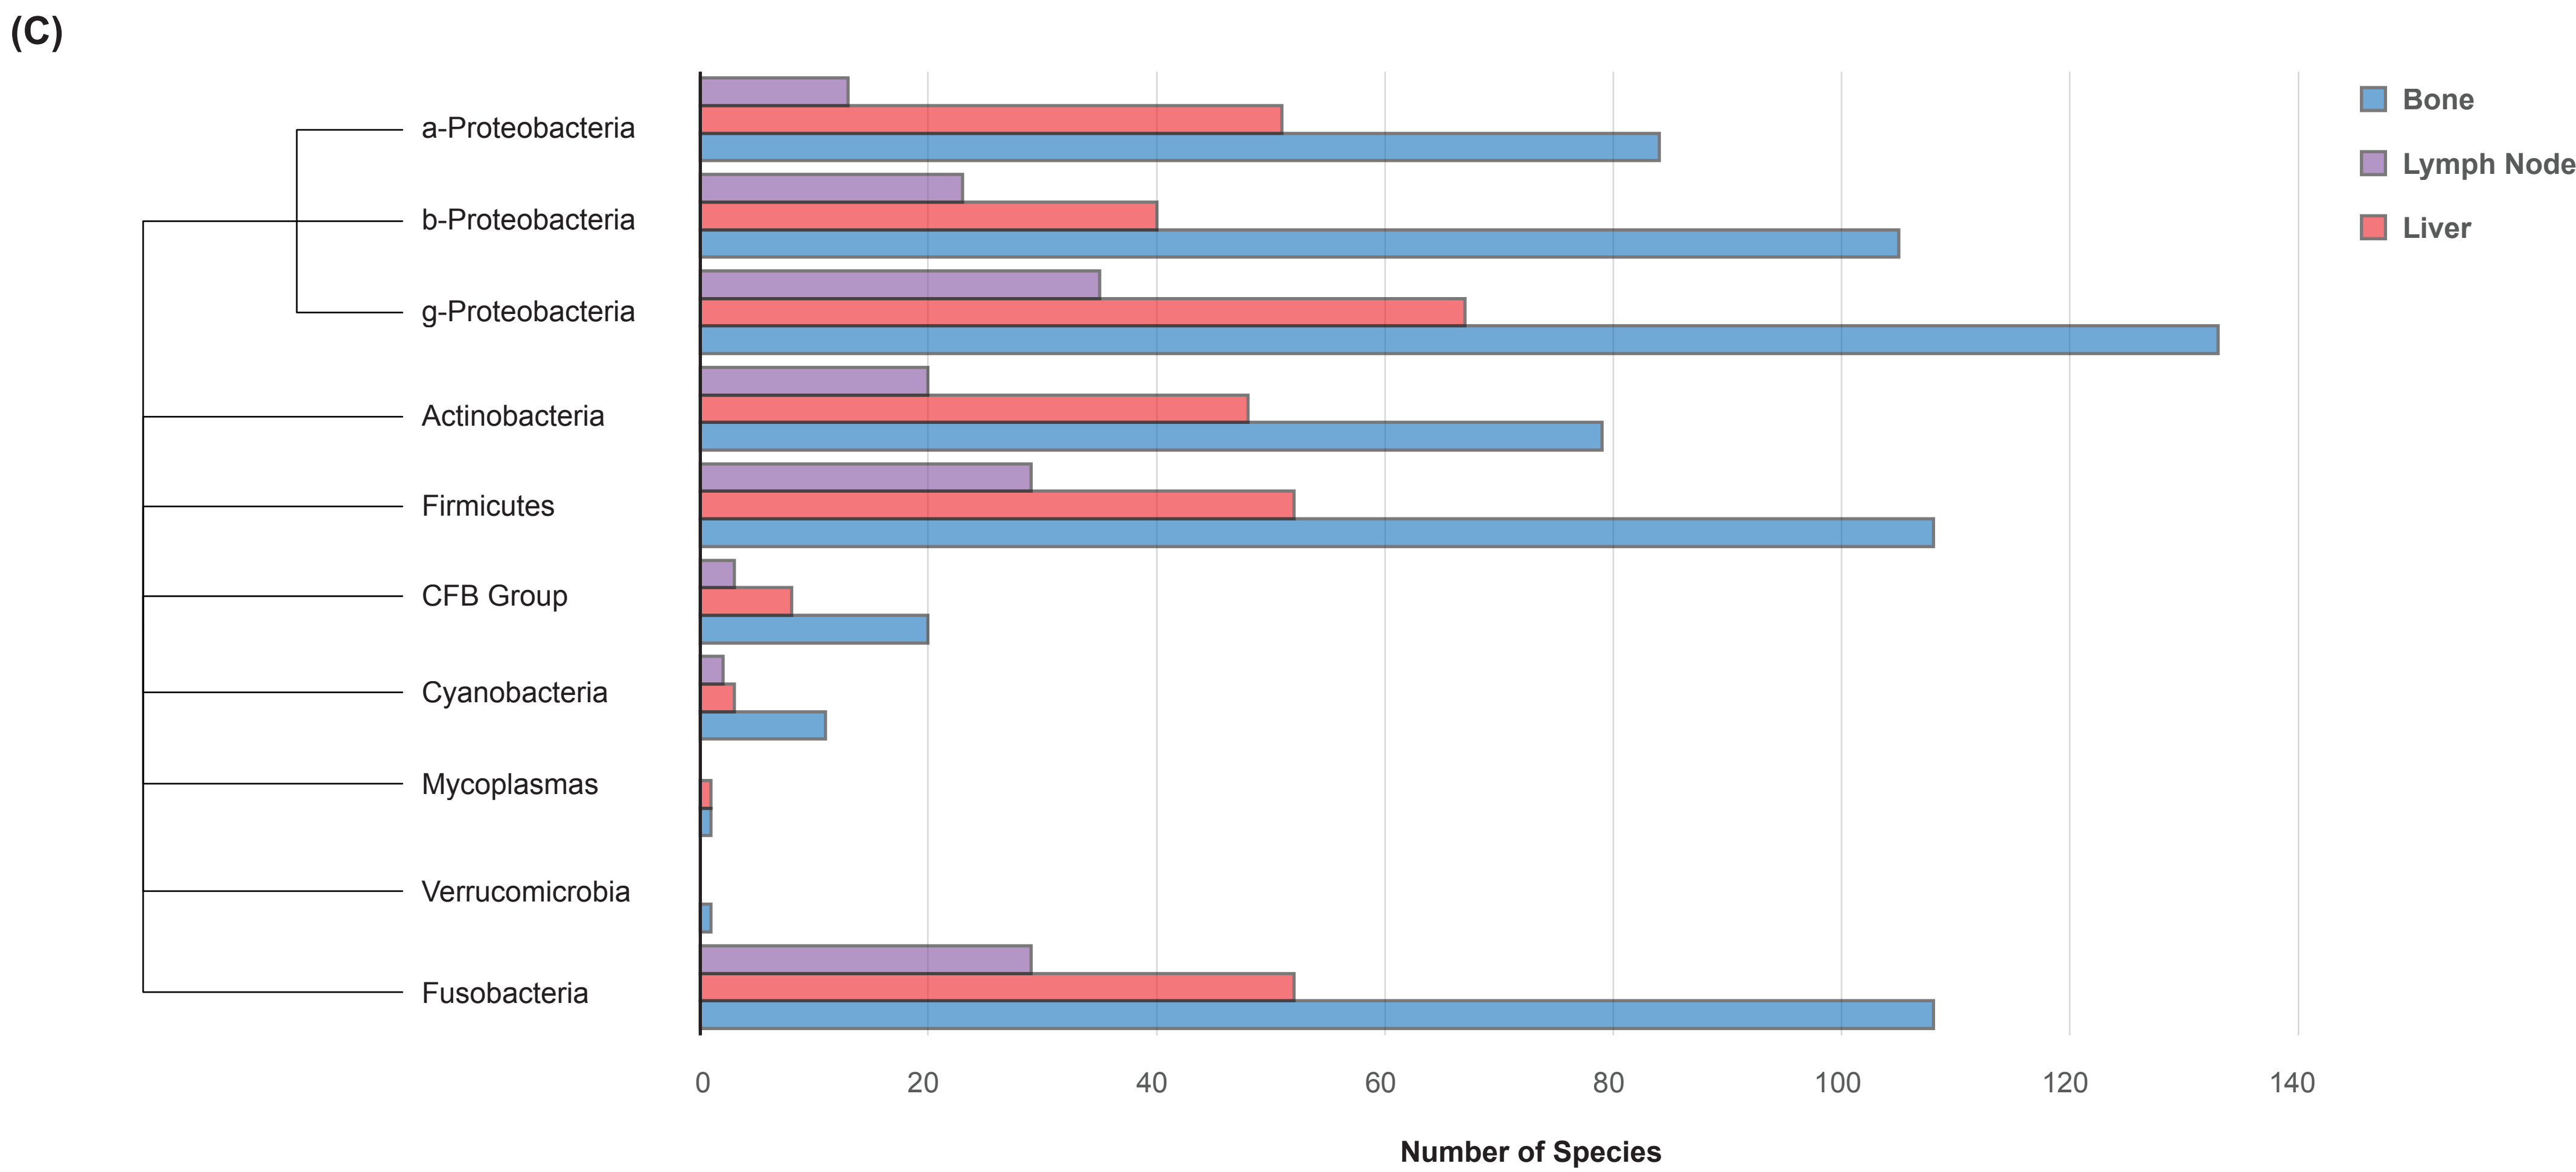

Supplement: s1 [file s1]
